# Supplementary material for: Kinetics of chalcone oxidation by peroxide anion catalysed by poly-l-leucineElectronic supplementary information (ESI) available: double reciprocal plots of the data in Fig. 1. See http://www.rsc.org/suppdata/cc/b4/b401497a/
Source: Royal Society of Chemistry journal article supplement (doi:10.1039/b401497a), 2004-01-01
Supplement: b401497a.doc [file b401497a.doc]

Double reciprocal plots of the data (points and lines) in Figure 1. Only the data up to 40 mM were considered.
